# Supplementary material
Source: publisher figshare collection journal article supplement (https://sage.figshare.com/ndownloader/files/18109667)
Supplement: Supplementary file 1 [file 18109667]

Appendix 1: Recurring Themes and Patterns in Qualitative Interviews

| Experience     | Competing warming methods       | Complementary care interactions | Design                 | Attitudes      | Preparation                  | Low resource settings | Use                               |
|----------------|---------------------------------|---------------------------------|------------------------|----------------|------------------------------|-----------------------|-----------------------------------|
| Infant comfort | Clothes                         | Breastfeeding (Q. 9)            | Color                  | Safety         | Challenges                   | Water access          | Resuscitation                     |
| Post-partum    | Electric warming table (Q. 1,4) | General infant care             | Size (Q. 8)            | Acceptance     | Ease of preparation (Q. 3,6) | Electricity access    | Delivery room                     |
|                |                                 | Kangaroo mothercare (Q. 2, 5)   | Material               | Fears/concerns | Time to prepare (Q. 7)       | Number of warmers     | Adverse effects                   |
|                |                                 |                                 | Temperature indicator  | Like/dislike   |                              |                       | Health facilities                 |
|                |                                 |                                 | Clarity of instruction |                |                              |                       | Transport                         |
|                |                                 |                                 |                        |                |                              |                       | Success or failure to warm (Q. 2) |
|                |                                 |                                 |                        |                |                              |                       | Easy/difficult to use (Q. 1,3,6)  |

Theme

Subtheme

## Appendix 2: Selected Quotes from Qualitative Interviews

| Quote (Q)                                                                                                                                                                                                                                                                                                                                                                                                                                                                                   | Position  |
|---------------------------------------------------------------------------------------------------------------------------------------------------------------------------------------------------------------------------------------------------------------------------------------------------------------------------------------------------------------------------------------------------------------------------------------------------------------------------------------------|-----------|
| 1 She can stay there watching her infant as it receives heat. For the electric warming table, you need to be there assisting the infant and regulating the heat every now and again in order that the infant doesn't have a problem. With the infant warmer, you measure the infant's temperature and when you find that it has decreased, you put it on the warmer and it stays with its mother and you only occasionally come to monitor how the infant is doing.                         | Nurse     |
| 2 Well, what I can say about that blanket is that it really warms up the baby; the baby was really cold and seriously unwell but once it lied on the blanket, it didn't have any more problems. Thereafter, I continued to monitor the baby and I realized that it did not experience any problem resulting from the blanket that is the reason why I liked it. Additionally, the warmer was beneficial to mothers when they grew tired of KMC, or for mothers who found KMC to be painful. | Caregiver |
| 3 For me, I found that the warmer doesn't cause any problem, it is a very good thing. Maybe you should see how you can supply the warmers to all health facilities and health posts, just everywhere so that new babies can be warmed up.                                                                                                                                                                                                                                                   | Caregiver |
| 4 You cannot see the baby when it is on the electric warming table; they place the baby on it. But with the infant warmer, you lie nearby and you breast feed the baby.                                                                                                                                                                                                                                                                                                                     | Caregiver |
| 5 It is true that the kangaroo mother care is good because it creates a relationship between mother and baby and love increases. However, this way can delay to warm up the baby slowly to the extent that we think it is not fast enough in relation to how much the baby is cold. To my observation, the infant warmer can increase the baby's temperature faster than the kangaroo mother care even if the kangaroo mother care is the best.                                             | Nurse     |
| 6 Nothing made it difficult for me to learn how to use it; it is something that is easy to learn and anyone without experience could learn how to use it, there is nothing difficult with it."                                                                                                                                                                                                                                                                                              | Nurse     |
| 7 I found that it is a challenge. Pad warming takes up a long time before you can save the babies who may abruptly come in for help, and you may find that you have not yet prepared the infant warmer.                                                                                                                                                                                                                                                                                     | Nurse     |
| 8 I like the design but I think they should increase its size because some infants grow faster and they might end up not fitting on the warmer.                                                                                                                                                                                                                                                                                                                                             | Caregiver |
| 9 When you put the infant on a warmer, who was in post-partum care crying and not breastfeeding. The infant starts to breastfeed and stop crying immediately. It is an amazing thing because mothers did not know what to do.                                                                                                                                                                                                                                                               | Nurse     |
